# Supplementary material
Source: PubMed Central journal article supplement (PMC3858996)
Supplement: 10-1055-s-0033-1350650-sup_gf650de.pdf [file 10-1055-s-0033-1350650-sup_gf650de.pdf]

# Einflüsse des Leistungsspektrums auf die Erlössituation und Finanzierbarkeit von Perinatalzentren Level I – theoretische Modelle zur wirtschaftlichen Leistungsprogrammplanung von Perinatalzentren

Impact of Patient and Procedure Mix on Finances of Perinatal Centres – Theoretical Models for Economic Strategies in Perinatal Centres

## Autoren

T. Hildebrandt, F. Kraml, S. Wagner, C. C. Hack, F. C. Thiel, S. Kehl, M. Winkler, W. Frobenius, F. Faschingbauer, M. W. Beckmann, M. P. Lux

## Institut

<sup>1</sup> Frauenklinik, Universitätsklinikum Erlangen, Erlangen

## Schlüsselwörter

- Perinatalzentren
- Finanzierung
- DRG-System
- Kosten
- Sectio-Rate

## Key words

- perinatal centres
- financing
- DRG system
- costs
- rate of caesarean sections

## Zusammenfassung

**Einleitung:** In der Diskussion über die Kosten- und Erlösstruktur von Krankenhäusern mit der Definition von Behandlungsschwerpunkten und Identifikation von unwirtschaftlichen Leistungen stehen auch Perinatalzentren (PNZ) vor neuen gesundheitsökonomischen Herausforderungen. Neben der Optimierung der Verweildauer ist hierbei auch der jeweilige „beste“ Patientenmix in Abhängigkeit von den zu erzielenden Erlösen und Deckungsbeiträgen für das Krankenhausmanagement entscheidend.

**Methodik:** Am Beispiel der Kostenstruktur des Universitäts-Perinatalzentrum Franken (UPF) wurden theoretische Kalkulationsmodelle berechnet und bei Veränderung des Leistungsspektrums sowie der Kapazitätsauslastung die Veränderungen auf die Erlössituation dargestellt. Als Grundlage der Berechnungen diente die reale Deckungsbeitrags-(DB-)Rechnung des UPF. Im Rahmen der modellhaften Deckungsbeitragsrechnung konnten Einflüsse auf die Kosten-Erlös-Situation bei verändertem Leistungsspektrum eines PNZ des Level I berechnet werden.

**Ergebnisse:** Unter Zuhilfenahme des durchschnittlichen DB I pro Pflgetag kann in gewinn- und verlustbringende DRGs unterschieden werden. Insgesamt wurden 19 theoretische Modelle erstellt. Als Bezugsmodell dienen die reale Deckungsbeitragsrechnung des UPF sowie das Modell bei 100%iger Bettenauslastung. Mittels Verdopplung der Anteile gewinnbringender DRGs und Halbierung der Anteile weniger lohnenswerter DRGs kann das Betriebsergebnis deutlich verbessert werden. Durch eine möglichst gewinnbringende Umverteilung der verschiedenen geleisteten Prozentzahlen je DRG an der Gesamtbettenauslastung auf andere DRGs kann das positive Betriebsergebnis darüber hinaus weiter gesteigert werden. Eine Spezialisierung auf ausschließlich pathologische Schwangerschaften ergibt ein ne-

## Abstract

**Introduction:** In Germany, cost and revenue structures of hospitals with defined treatment priorities are currently being discussed to identify uneconomic services. This discussion has also affected perinatal centres (PNCs) and represents a new economic challenge for PNCs. In addition to optimising the time spent in hospital, the hospital management needs to define the “best” patient mix based on costs and revenues.

**Method:** Different theoretical models were proposed based on the cost and revenue structures of the University Perinatal Centre for Franconia (UPF). Multi-step marginal costing was then used to show the impact on operating profits of changes in services and bed occupancy rates. The current contribution margin accounting used by the UPF served as the basis for the calculations. The models demonstrated the impact of changes in services on costs and revenues of a level 1 PNC.

**Results:** Contribution margin analysis was used to calculate profitable and unprofitable DRGs based on average inpatient cost per day. Nineteen theoretical models were created. The current direct costing used by the UPF and a theoretical model with a 100% bed occupancy rate were used as reference models. Significantly higher operating profits could be achieved by doubling the number of profitable DRGs and halving the number of less profitable DRGs. Operating profits could be increased even more by changing the rates of profitable DRGs per bed occupancy. The exclusive specialisation on pathological and high-risk pregnancies resulted in operating losses. All models which increased the numbers of caesarean sections or focused exclusively on c-sections resulted in operating losses.

**Conclusion:** These theoretical models offer a basis for economic planning. They illustrate the enormous impact potential changes can have on the operating profits of PNCs. Level 1 PNCs require

eingereicht 20.5.2013

revidiert 30.5.2013

akzeptiert 1.6.2013

## Bibliografie

**DOI** <http://dx.doi.org/10.1055/s-0033-1350650>  
Geburtsh Frauenheilk 2013; 73:  
1–10 © Georg Thieme  
Verlag KG Stuttgart · New York ·  
ISSN 0016-5751

## Korrespondenzadresse

**Dr. Thomas Hildebrandt**  
Universitätsklinikum Erlangen  
Frauenklinik  
91054 Erlangen  
thomas.hildebrandt@  
uk-erlangen.de

gatives Betriebsergebnis. Modelle mit forcierter oder ausschließlicher Konzentration auf Sectiones im Leistungsangebot führen allesamt zu einem negativen Betriebsergebnis.

**Schlussfolgerung:** Mittels der theoretischen Modelle sind Planungen aus betriebswirtschaftlicher Sicht möglich. Es wird deutlich, welchen z. T. enormen Veränderungen ein Betriebsergebnis eines PNZ unterliegen kann. PNZ Level I benötigen insbesondere eine hohe Auslastung ihrer Bettenkapazitäten und einen gewinnbringenden Fallmix, um die durch die gesetzlichen Anforderungen sehr hohen Kosten decken zu können. Zudem kann auf Basis der theoretischen Modelle konstatiert werden, dass es die vaginalen Geburten (nicht Sectiones) sind, welche im aktuellen DRG-System kostendeckend abgebildet sind. Insgesamt erscheint es für PNZ Level I ökonomisch sinnvoller zu sein, möglichst viele Schwangerschaften und Neugeborene mit einem niedrigen Risikoprofil zu behandeln, um die Kosten decken zu können.

## Einleitung

Das deutsche Gesundheitswesen befindet sich seit einigen Jahren in einem tief greifenden Struktur- und Kulturwandel. Durch den Gesetzgeber entstehen zunehmend neue Rahmenbedingungen, die zu mehr Transparenz der medizinischen Leistungen sowie der Kosten- und Erlösstruktur der Krankenhäuser bei einem verstärkten Streben nach Wirtschaftlichkeit führen sollen. Durch den stetig steigenden Wettbewerbsdruck wird angenommen, dass in den kommenden 10 Jahren 30% der Kliniken in Deutschland geschlossen werden müssen [1–3].

Aus diesem Grund stehen auch die Perinatalzentren zunehmend im Fokus gesundheitsökonomischer Fragestellungen. Im Falle der Vorhaltung einer Geburtshilfe stellt sich zunächst die Frage der besten Stufe für das Haus (Level I–IV entsprechend den Kriterien des Gemeinsamen Bundesausschusses) [4]. Die Definition von Behandlungsschwerpunkten und somit Entscheidungen über das Leistungsspektrum von wirtschaftlichen und unwirtschaftlichen Leistungen werden in den kommenden Jahren zunehmend an Bedeutung gewinnen [5].

Um wettbewerbsfähig zu bleiben und die eigene Wirtschaftlichkeit zu stärken, muss eine Optimierung der Verweildauer angestrebt werden. Auch ein Abbau von Akutkrankenhausbetten, deren Vorhaltung zu hohen Fixkosten führt, ist eine Möglichkeit, dem steigenden Kostendruck standzuhalten [6, 7]. Zudem ist die Kenntnis der „kosteneffektivsten“ Patienten- bzw. Leistungsstruktur in Abhängigkeit von den zu erzielenden Erlösen und Deckungsbeiträgen für ein Krankenhaus entscheidend [8, 9]. Zahlreiche Krankenhäuser beabsichtigen, durch Spezialisierung und Zentrenbildung komplexere Leistungen und damit erstrebtechnisch „höherwertige“ DRGs (Diagnosis Related Groups) erzielen zu können [8]. Ob diese Strategie allerdings unter ökonomischen Gesichtspunkten für Perinatalzentren tatsächlich empfehlenswert ist, bedarf einer näheren wissenschaftlichen Beleuchtung. Zwar handelt es sich bei Perinatalzentren des Level I um Zentren der Maximalversorgung, welche grundsätzlich keine Fälle ablehnen dürfen. Allerdings besteht durch gewisse Marketing- und Kooperationsstrategien die Möglichkeit, den Patientenmix in bestimmten Grenzen zu steuern und bei gleich bleibender Angebotsbreite die Fallzahlen der verschiedenen Leistungen zu beeinflussen, oder bei einer besonders defizitären Patientinnenstruktur in der Versorgung gezielt Zuschläge mit den Kostenträgern zu verhandeln. Neben der eigentlichen Fallzahl spielt die Art der DRG insbesondere für Perinatalzentren eine wesentliche Rolle, da sehr hetero-

high bed occupancy rates and a profitable patient mix to cover the extremely high costs incurred due to the services they are legally required to offer. Based on our theoretical models it must be stated that spontaneous vaginal births (not caesarean sections) were the most profitable procedures in the current DRG system. Overall, it currently makes economic sense for level I PNCs to treat as many low-risk pregnancies and neonates as possible to cover costs.

gene Fälle betreut werden – von der langliegenden Schwangeren mit einem vorzeitigen Blasensprung in der 28. Schwangerschaftswoche bis zur komplikationslosen ambulanten Spontangeburt am Termin [10].

Des Weiteren unterliegen die Perinatalzentren gesondert den Anforderungen des Gemeinsamen Bundesausschusses, welche mit zusätzlichen Ressourcen und somit Kosten verbunden sind. Beispielsweise sind hier die ärztliche wie pflegerische Rundum-die-Uhr-Besetzung von Entbindungsbereich und Intensivstation, die ständige Rufbereitschaft eines Neonatologen, die Rufbereitschaft eines Geburtshelfers mit Schwerpunktbezeichnung in Spezieller Geburtshilfe und Perinatalmedizin, aber auch infrastrukturelle Vorgaben wie die „Wand-an-Wand-Lokalisation“ von Neugeborenen-Intensivstation, Entbindungsbereich und Operationssaal und das Vorhalten von mindestens 6 Intensivtherapieplätzen zu nennen [4, 11].

Gerade aufgrund dieser hohen und kostenintensiven Anforderungen und der aktuellen Mindestmengendiskussion stehen in der Perinatalmedizin weitreichende Entscheidungen in Bezug auf Planung und Management an. Hierbei ist die Kenntnis über mögliche Einflüsse des jeweiligen Leistungsspektrums essenziell. Für die zukünftige Existenzsicherung sind folgende Fragen für das Krankenhausmanagement von besonderem Interesse, welche im Rahmen der vorliegenden Arbeit am Beispiel theoretischer Modelle beantwortet werden:

- ▶ Welche DRGs bzw. welches Leistungsspektrum haben bzw. hat welchen Einfluss auf das Betriebsergebnis?
- ▶ Ist es anhand dessen ökonomisch sinnvoller, Patientinnen mit möglichst hohem oder niedrigem Risikoprofil zu behandeln?
- ▶ Welche ökonomischen Einflüsse sind durch die jeweiligen geburtshilflichen Prozeduren zu erwarten, insbesondere in Hinblick auf die Spontangeburt im Vergleich zum Kaiserschnitt?
- ▶ Welche Auswirkungen hat die volle Ausschöpfung aller Betten- und OP-Minuten-Kapazitäten und womit ist bei teilweise ungenutzten Kapazitäten zu rechnen?

## Material und Methoden

Die Basis für alle vorgestellten theoretischen Kalkulationsmodelle bilden die Daten einer mehrstufigen Deckungsbeitragsrechnung des Betriebsergebnisses des Universitäts-Perinatalzentrums Franken (UPF) aus dem Jahr 2009 [12].

Bei den Engpasskapazitätsrechnungen sind die P-DRGs (Neugeborene) an der Auslastung der 36 in der Geburtshilfe der Frauenklinik des Universitätsklinikums Erlangen zur Verfügung stehenden Betten nicht beteiligt. Als OP-DRGs (operative DRGs) wurden ausschließlich die DRGs O01A-O40Z berücksichtigt (Tab. 1).

Soweit bei der Kurzbeschreibung der einzelnen theoretischen Modelle nicht anders beschrieben, wurden für die jeweiligen DRGs die entsprechenden realen Pflgeetage ermittelt und folgend die Summe der maximalen Fallzahlen der DRGs entsprechend der Gesamtverweildauertage des Jahres 2009 berechnet. Die Gesamtverweildauertage und die Gesamt-OP-Minuten wurden in dem Modell als begrenzende Engpasskapazitäten definiert.

Aus diesem Grund wurde analysiert, zu welchen Prozentzahlen die einzelnen DRGs im Jahr 2009 an der Auslastung der Gesamtpflegetage und an der Auslastung der Gesamt-OP-Minuten beteiligt waren. Im nächsten Schritt wurden – mittels der individuell unterschiedlichen durchschnittlichen Verweildauern und durchschnittlichen OP-Zeiten je DRG-Fall – die maximal möglichen Fallzahlen beim alleinigen Anbieten dieser einzelnen DRGs, und jeweils einer anhand des Realmodell kalkulierten begrenzenden Engpasskapazität von 13 140 Pflgeetagen berechnet. Mit der theoretischen Annahme, dass in dem vorhandenen Kreißsaal-OP des UPF an allen Werktagen eines Jahres jeweils 10 Stunden und an allen Wochenend- und Feiertagen jeweils 4 Stunden operiert werden könnte, resultiert insgesamt eine po-

**Tab. 1** Einteilung der DRGs nach gewinn- und verlustbringenden Leistungen (mittelgrau : lohnenswerte DRGs für das Perinatalzentrum, dunkelgrau : weniger lohnenswerte DRGs für das Perinatalzentrum, hellgrau : Mittelstellung zwischen lohnenswerten und weniger lohnenswerten DRGs = erlösneutrale DRGs).

| DRG  | Kurzbeschreibung der DRG                                                                                                                                           | durchschnittlicher DBI je DRG-Fall pro Pflgetag in € |
|------|--------------------------------------------------------------------------------------------------------------------------------------------------------------------|------------------------------------------------------|
| O01A | Sectio mit mehreren komplizierenden Diagnosen, bis 25 vollendete SSW oder mit intrauteriner Therapie oder komplizierender Konstellation                            | 193,00                                               |
| O01B | Sectio mit mehreren komplizierenden Diagnosen, 26 bis 33 vollendete SSW, ohne intrauterine Therapie, ohne komplizierende Konstellation                             | 269,49                                               |
| O01C | Sectio mit mehreren komplizierenden Diagnosen, > 33 SSW, ohne intrauterine Therapie, ohne komplizierende Konstellation oder mit komplizierender Diagnose           | 333,76                                               |
| O01D | sekundäre Sectio mit mehreren komplizierenden Diagnosen, > 33 SSW, ohne intrauterine Therapie, ohne komplizierende Konstellation oder mit komplizierender Diagnose | 371,89                                               |
| O01E | sekundäre Sectio mit komplizierender Diagnose, > 33 SSW, ohne komplexe Diagnose                                                                                    | 376,38                                               |
| O01F | Sectio ohne komplizierende Diagnose, > 33 SSW, ohne komplexe Diagnose                                                                                              | 448,28                                               |
| O02A | vaginale Entbindung mit komplizierender OR-Prozedur, bis 33 SSW oder mit intrauteriner Therapie oder komplizierender Konstellation                                 | 535,39                                               |
| O02B | vaginale Entbindung mit komplizierender OR-Prozedur, > 33 SSW, ohne intrauterine Therapie, ohne komplizierende Konstellation                                       | 384,85                                               |
| O03Z | Extrauterin gravidität                                                                                                                                             | 430,05                                               |
| O04Z | stationäre Aufnahme nach Entbindung oder Abort mit OR-Prozedur                                                                                                     | 191,89                                               |
| O05A | Cerclage und Muttermundverschluss                                                                                                                                  | 611,44                                               |
| O05B | bestimmte OR-Prozeduren in der Schwangerschaft ohne Cerclage, ohne Muttermundverschluss                                                                            | 518,14                                               |
| O06B | intrauterine Therapie des Feten ohne Lasertherapie                                                                                                                 | 263,51                                               |
| O40Z | Abort mit Dilatation und Kürettage, Aspirationskürettage oder Hysterotomie                                                                                         | 387,62                                               |
| O60A | vaginale Entbindung mit mehreren komplizierenden Diagnosen, mindestens eine schwer, bis 33 SSW oder mit komplizierender Konstellation                              | 454,18                                               |
| O60B | vaginale Entbindung mit mehreren komplizierenden Diagnosen, mindestens eine schwer, > 33 SSW, ohne komplizierende Konstellation                                    | 391,73                                               |
| O60C | vaginale Entbindung mit schwerer oder mäßig schwerer komplizierender Diagnose                                                                                      | 376,64                                               |
| O60D | vaginale Entbindung ohne komplizierende Diagnose                                                                                                                   | 416,56                                               |
| O61Z | stationäre Aufnahme nach Entbindung oder Abort ohne OR-Prozedur                                                                                                    | 250,26                                               |
| O62Z | drohender Abort                                                                                                                                                    | 365,45                                               |
| O63Z | Abort ohne Dilatation und Kürettage, Aspirationskürettage oder Hysterotomie                                                                                        | 236,92                                               |
| O64A | frustrane Wehen, mehr als ein Belegungstag                                                                                                                         | 208,18                                               |
| O64B | frustrane Wehen, ein Belegungstag                                                                                                                                  | 282,43                                               |
| O65A | andere vorgeburtliche stationäre Aufnahme mit äußerst schweren oder schweren CC                                                                                    | 98,76                                                |
| O65B | andere vorgeburtliche stationäre Aufnahme ohne äußerst schwere oder schwere CC                                                                                     | 176,17                                               |
| P60A | Neugeborenes, verstorben < 5 Tage nach Aufnahme ohne signifikante OR-Prozedur                                                                                      | 2 041,92                                             |
| P66C | Neugeborenes, Aufnahmegegewicht 2 000–2 499 g ohne signifikante OR-Prozedur, ohne Beatmung > 95 h, mit anderem Problem                                             | 1 276,11                                             |
| P66D | Neugeborenes, Aufnahmegegewicht 2 000–2 499 g ohne signifikante OR-Prozedur, ohne Beatmung > 95 h, ohne Problem oder Mehrling, Aufnahmegegewicht > 2 499 g         | 284,11                                               |
| P67B | Neugeborenes, Aufnahmegegewicht > 2 499 g ohne signifikante OR-Prozedur, ohne Beatmung > 95 h, mit schwerem Problem                                                | 902,76                                               |
| P67C | Neugeborenes, Aufnahmegegewicht > 2 499 g ohne signifikante OR-Prozedur, ohne Beatmung > 95 h, mit anderem Problem                                                 | 449,17                                               |
| P67D | neugeborener Einling, Aufnahmegegewicht > 2 499 g ohne OR-Prozedur, ohne Beatmung > 95 h, ohne schweres Problem, ohne anderes Problem                              | 203,80                                               |

DRG = Diagnosis Related Groups; DB = Deckungsbeitrag; O01A–P67D = für Perinatalzentrum relevante DRGs; SSW = Schwangerschaftswoche; OR-Prozedur = Operating-Room-Prozedur, signifikante Eingriffe im Rahmen des DRG-Systems; CC = Komplikationen und/oder Komorbiditäten

tenzielle OP-Kapazität von 176 880 OP-Minuten. Setzt man stattdessen voraus, dass an jedem Tag im Jahr 24 Stunden pro Tag operiert wird, ergibt sich eine OP-Kapazität von 525 600 OP-Minuten.

Anschließend konnte für jede DRG in den verschiedenen theoretischen Modellen die prozentuale Ausschöpfung der begrenzenden Engpasskapazität festgelegt werden, damit für eine bessere Vergleichbarkeit der Modelle untereinander die begrenzende Engpasskapazität möglichst zu 100% ausgelastet ist.

Nach Festlegung der Fallzahlen für die theoretischen Modelle konnte wieder auf die Daten der Kalkulation des Realmodells des UPF zurückgegriffen werden. Die jeweilige Gesamtverweildauer resultiert aus der Multiplikation der ermittelten Fallzahlen mit den durchschnittlichen Verweildauern je DRG-Fall. Analog konnte die Gesamt-OP-Zeit je DRG bestimmt werden. Die Fallzahlen je DRG wurden mit dem durchschnittlichen Deckungsbeitrag I je DRG-Fall multipliziert; folgend wurden die Ergebnisse zum Deckungsbeitrag I summiert.

Im nächsten Schritt wurden die Fixkosten des UPF aus dem Jahr 2009 abgezogen. Der hierdurch ermittelte Deckungsbeitrag II auf stationärer (DRG-)Ebene wurde mit den Deckungsbeiträgen II der ambulanten Bereiche (Pränatalambulanz und Schwangerenambulanz des UPF) aus dem Jahr 2009 addiert. Diese wurden in den theoretischen Modellen nicht modifiziert. Von dieser Summe der Deckungsbeiträge II musste lediglich noch die Verwaltungsgemeinkostenpauschale abgezogen werden. Diese entspricht jeweils 19,3% aller Erlöse des UPF.

Die Kosten-Erlös-Situation für ambulante Patientinnen und Leistungen wurde in der vorliegenden Arbeit nicht betrachtet, da sich die theoretischen Modelle auf den Einfluss der jeweiligen stationären Fallkonstellationen konzentrieren. Die betriebswirtschaftlichen Vor- und Nachteile ambulanter Strukturen wurden im Realmodell näher beleuchtet [12].

Grundsätzlich sollte in den theoretischen Modellen das Verhältnis der Anzahl von Geburten zu geleisteten P-DRGs identisch zu dem Verhältnis im Realmodell sein. Im Jahr 2009 gab es im Perinatalzentrum 2143 Geburten und 1615 P-DRGs; dieses entspricht einem Verhältnis von Geburten zu P-DRGs von 1,33. Die Anzahl der P-DRGs in den theoretischen Modellen berechnet sich folglich durch Division der Geburtenzahl des jeweiligen Modells durch das Verhältnis von Geburten zu P-DRGs aus dem Jahr 2009. Um das Betriebsergebnis an die eventuelle Über- oder Unterlastung der Bettenkapazitäten angleichen zu können, musste berechnet werden, wie viele Betten für den jeweiligen genannten Fallmix benötigt werden. Bei den Personalkosten handelt es sich um sprungfixe Kosten, welche bei höheren und niedrigeren Kapazitäten nicht proportional ansteigen und abfallen, sondern sich stufenweise ändern. Dennoch wurde in den vorliegenden Betrachtungen der theoretischen Modelle vereinfachend eine Proportionalisierung der Fixkosten anhand der zusätzlich benötigten Betten vorgenommen.

## Ergebnisse

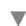

Unter Zuhilfenahme des durchschnittlichen Deckungsbeitrag I und der durchschnittlichen Verweildauer je DRG kann der durchschnittliche Deckungsbeitrag I je DRG-Fall pro Pflage-tag berechnet werden. Unter Berücksichtigung der jeweiligen Realkosten kann eine Einteilung nach gewinn- und verlustbringenden DRGs erfolgen. Diese sind für das Management des Leistungsangebots im Rahmen der theoretischen Modelle von großer Relevanz.

Zu den gewinnbringendsten DRGs zählen infolgedessen insbesondere komplikationslose Spontangeburt am Termin (O60D), vaginale Geburten mit komplizierender OR-Prozedur (Operating-Room-Prozedur, signifikante Eingriffe im Rahmen des DRG-Systems) oder mehreren komplizierenden Diagnosen bis zur 33. Schwangerschaftswoche (SSW; O02A, O60A), aber auch die Sectio ohne komplizierende Diagnose größer der 33. SSW (O01F). Im Gegensatz dazu können die folgenden DRGs des UPF unter Berücksichtigung der Realkosten als weniger lohnenswert klassifiziert werden: Sectio mit mehreren komplizierenden Diagnosen (O01A–O01C), vaginale Entbindung mit komplizierender OR-Prozedur größer der 33. SSW (O02B) sowie vorgeburtliche stationäre Aufnahmen (O64A, O64B, O65A, O65B). Eine Übersicht über die jeweiligen Deckungsbeiträge I je DRG-Fall pro Pflage-tag präsentiert die **Tab. 1**. Die Kurzbeschreibung fasst jeweils die wichtigsten Eckpunkte der DRGs zusammen. Die als gewinnbringend eingestuften DRGs sind mittelgrau markiert, die weniger lohnenswerten dagegen dunkelgrau. Alle nicht markierten DRGs nehmen eine Mittelstellung zwischen gewinn- und verlustbringend ein.

Insgesamt wurden 19 theoretische Modelle erstellt (**Tab. 2**). Fünfzehn Modelle sind direkt miteinander vergleichbar, da sie allesamt durch eine Auslastung der Bettenkapazitäten von 100% charakterisiert sind. Alle Modelle liegen unterhalb einer möglichen und realistischen OP-Kapazitätsgrenze von 176 880 OP-Minuten mit Ausnahme des theoretischen Modells „O“, welches mit 194 296 OP-Minuten knapp darüber liegt. Durch die vergleichbare Ausnutzung der Engpasskapazitäten kann auch von annähernd identischen Fixkosten ausgegangen werden.

Bei den Modellen „2009“ und „2009 100%“ handelt es sich um die Bezugsmodelle (in **Tab. 2** mit hellgrauem Hintergrund dargestellt). Im Modell „2009“ wurde das Betriebsergebnis, basierend auf der gleichen Bettenauslastung, sowie denselben Verhältnissen der DRGs untereinander an der Ausnutzung der Bettenkapazitäten des Jahres 2009, berechnet. Die basierenden Kostendaten als auch Erlöse und die möglichen Einflussfaktoren auf das Basismodell werden an anderer Stelle präsentiert und diskutiert [12].

Von besonderer Bedeutung im Vergleich mit den anderen theoretischen Modellen mit 100%iger Auslastung der Bettenkapazitäten ist das Modell „2009 100%“. Liegt das Betriebsergebnis eines theoretischen Modells, bei ebenfalls Vollausslastung der zur Verfügung stehenden Betten, oberhalb des Betriebsergebnisses des Modells „2009 100%“, ist dieses aus Sicht des Krankenhausmanagements, ohne zunächst die medizinischen, ethischen und gesetzlichen Fragen zu berücksichtigen, rein aus wirtschaftlicher Sicht empfehlenswert (in **Tab. 2** mittelgrau markiert). Liegt das Betriebsergebnis eines theoretischen Modells allerdings darunter (in **Tab. 2** dunkelgrau), sollte das Leistungsspektrum geprüft und, falls möglich, Maßnahmen eingeleitet werden.

Bei proportionaler Anpassung der Fixkosten an die Über- oder Unterlastung der begrenzenden Engpasskapazität Pflage-tag resultiert in Modell „D“ ein positives Betriebsergebnis von 108 665,02 €, in Modell „H“ ein negatives Betriebsergebnis von –1 484 022,70 € und in Modell „Q“ ein positives Betriebsergebnis von 3 109 527,44 €.

Aufgrund des positiven Betriebsergebnis von 1 742 922,43 € mittels Verdopplung der Anteile gewinnbringender DRGs und Halbierung der Anteile weniger lohnenswerter DRGs handelt es sich bei dem Modell „M“ um einen empfehlenswerten Fallmix für ein Perinatalzentrum. Modell „O“ ergibt durch die möglichst gewinnbringende Umverteilung der verschiedenen geleisteten Pro-

**Tab. 2** Übersicht über die entworfenen theoretischen Modelle und deren Ergebnisse (hellgrau : reale Bezugsmodelle [Realmodell 2009 sowie mögliches reales Betriebsergebnis bei Vollaustlastung]; dunkelgrau : weniger lohnenswerte bis defizitäre Modelle im Vergleich zum realen Kostenmodell; mittelgrau : lohnenswertere Modelle im Vergleich zum realen Kostenmodell).

| Modell    | Kurzbeschreibung des Modells                                                                                                                                                                                                                         | Bettenauslastung (%) | OP-Minuten | Betriebs-ergebnis (€) |
|-----------|------------------------------------------------------------------------------------------------------------------------------------------------------------------------------------------------------------------------------------------------------|----------------------|------------|-----------------------|
| 2009      | Bettenauslastung wie im Jahr 2009, gleicher Fallmix, keine P-DRG-Subventionen                                                                                                                                                                        | 79,70%               | 73 090     | 145 787,38            |
| 2009 100% | Modell „2009“ bei 100% Auslastung der Bettenkapazitäten                                                                                                                                                                                              | 100,00%              | 91 700     | 1 124 999,15          |
| A         | keine Geburten, keine P-DRGs                                                                                                                                                                                                                         | 100,00%              | 80 611     | - 1 739 546,56        |
| B         | alle gering pathologischen oder unpathologischen Schwangerschaften oder Kinder werden abgewiesen                                                                                                                                                     | 100,00%              | 142 465    | - 769 041,28          |
| C         | es werden ausschließlich wenig lohnenswerte DRGs angeboten                                                                                                                                                                                           | 100,00%              | 34 364     | - 638 621,25          |
| D         | OP-Kapazität (176 880 Minuten) wird komplett auf alle operativen DRGs verteilt; Verteilung der DRGs nach Anteilen der jeweiligen DRGs an den OP-Minuten aus dem Jahr 2009; keine anderen DRGs; Bettenzahl könnte um 6 reduziert werden               | 84,42%               | 176 880    | - 503 067,48          |
| E         | Verteilung sämtlicher Bettenkapazitäten, die im Jahr 2009 für Entbindungen verwendet wurden, zu gleichen Anteilen auf die 6 verschiedenen O01-DRGs (Sectiones); restliche DRGs bleiben von den Anteilen an der Auslastung der Bettenkapazität gleich | 100,00%              | 135 656    | - 75 948,71           |
| F         | keine P-DRGs                                                                                                                                                                                                                                         | 100,00%              | 91 700     | - 36 074,87           |
| G         | ausschließlich vorgeburtliche DRGs O64A/B und O65A/B und Sectiones; P-DRGs nach dem gleichen Verhältnis wie aus dem Jahr 2009                                                                                                                        | 100,00%              | 144 122    | 319 984,76            |
| H         | OP-Kapazität (176 880 Minuten) wird komplett zu je 16,67% auf die 6 verschiedenen Sectio-DRGs verteilt; keine anderen DRGs; insgesamt 20 zusätzliche Betten benötigt und daraus resultierend eigentlich höhere Fixkosten                             | 155,90%              | 176 880    | 555 085,64            |
| I         | es werden ausschließlich nicht operative DRGs angeboten                                                                                                                                                                                              | 100,00%              | 0          | 1 170 873,41          |
| J         | siehe Modell „E“ und „N“; anstelle der O01/O02-DRGs in diesem Modell die O60-DRGs (vaginale Entbindungen)                                                                                                                                            | 100,00%              | 13 092     | 1 204 986,82          |
| K         | siehe Modell „G“; anstelle Sectiones in diesem Modell O60-DRGs (vaginale Entbindungen)                                                                                                                                                               | 100,00%              | 0          | 1 214 574,84          |
| L         | alle Schwangerschaften und Kinder mit Pathologien werden abgewiesen                                                                                                                                                                                  | 100,00%              | 72 956     | 1 415 465,45          |
| M         | Verdopplung der Anteile an der Gesamtbettenkapazität gewinnbringender DRGs, Halbierung der Anteile wenig lohnenswerter DRGs; Angleichung der berechneten Anteile an 100%ige Bettenauslastung; P-DRGs von ihren Anteilen wie im Jahr 2009             | 100,00%              | 96 038     | 1 742 922,43          |
| N         | siehe Modell „E“ und „J“; anstelle der O01- und O60-DRGs in diesem Modell die O02-DRGs (vaginale Entbindungen mit komplizierender OR-Prozedur)                                                                                                       | 100,00%              | 162 377    | 3 133 122,76          |
| O         | Anteile je DRG an der Engpasskapazität Pflagezeit sollen möglichst gewinnbringend auf andere DRGs umverteilt werden                                                                                                                                  | 100,00%              | 194 296    | 3 221 534,33          |
| P         | siehe Modell „C“, anstelle der wenig lohnenswerten DRGs in diesem Modell nur die Gewinnbringendsten                                                                                                                                                  | 100,00%              | 92 918     | 5 108 788,48          |
| Q         | 24 Kreißsaal-OP-Stunden pro Tag (525 600 OP-Minuten im Jahr); ausschließlich Sectiones und P-DRGs; insgesamt 63 zusätzliche Betten benötigt                                                                                                          | 275,01%              | 525 600    | 9 532 718,69          |

DRG = Diagnosis Related Groups; OP = Operation; P-DRG = pädiatrische DRG

**Tab. 3** Veränderung des Betriebsergebnisses je nach Auslastung der Gesamtbettenkapazitäten bei gleich bleibenden Fixkosten.

| Auslastung der Gesamtbettenkapazität (%) | Gesamtverweildauertage | Gesamt-OP-Zeit (min) | DB I auf DRG-Ebene (€) | DB II auf DRG-Ebene (€) | Betriebsergebnis des UPF (DB III) (€) |
|------------------------------------------|------------------------|----------------------|------------------------|-------------------------|---------------------------------------|
| 50%                                      | 6 570                  | 45 850               | 3 172 758,60           | - 497 636,40            | - 1 285 437,66                        |
| 70%                                      | 9 198                  | 64 190               | 4 441 417,45           | 771 022,45              | - 321 602,28                          |
| 71%                                      | 9 330                  | 65 107               | 4 504 665,14           | 834 270,14              | - 273 553,65                          |
| 75%                                      | 9 855                  | 68 775               | 4 759 137,90           | 1 088 742,90            | - 80 214,04                           |
| 76,66%                                   | 10 074                 | 70 299               | 4 864 791,76           | 1 194 396,76            | 57,54                                 |
| 79,70%                                   | 10 474                 | 73 090               | 5 056 630,76           | 1 386 235,76            | 145 787,38                            |
| 85%                                      | 11 169                 | 77 945               | 5 393 837,81           | 1 723 442,81            | 401 989,91                            |
| 95%                                      | 12 483                 | 87 115               | 6 028 537,73           | 2 358 142,73            | 884 193,86                            |
| 100%                                     | 13 140                 | 91 700               | 6 345 503,71           | 2 675 108,71            | 1 124 999,15                          |
| 105%                                     | 13 797                 | 96 285               | 6 663 237,65           | 2 992 842,65            | 1 366 397,82                          |
| 120%                                     | 15 768                 | 110 041              | 7 614 176,04           | 3 943 781,04            | 2 088 844,95                          |

DB = Deckungsbeitrag; DRG = Diagnosis Related Groups; min = Minuten; OP = Operation

zentzahlen je DRG an der Gesamtbettenauslastung des UPF aus dem Jahr 2009 auf andere DRGs sogar ein positives Betriebsergebnis von 3 221 534,33 €.

Aufgrund der Tatsache, dass die Engpasskapazität „Pflagezeit“ sich in den entworfenen Simulationen als die entscheidende herausgestellt hat, ist eine Überprüfung der Abhängigkeit des Be-

triebsergebnisses von dem Grad der Auslastung der Bettenkapazitäten besonders wichtig. Unter der Bedingung, dass jegliche Auslastung der bereitstehenden Betten mit gleich bleibenden Fixkosten verbunden ist, besteht, bei ansonsten gleich bleibendem Leistungsangebot, ein linearer Zusammenhang zwischen der Auslastung der Bettenkapazitäten und dem Betriebsergebnis

(Tab. 3). Bei 50%iger Auslastung würde das UPF einen Verlust von – 1 285 437,66 € erwirtschaften. Die Schwelle, an der das UPF genau zwischen Verlust und Gewinn, ein Betriebsergebnis von etwa 0 € erwirtschaften würde, befindet sich bei einer Bettenauslastung von 76,66%. Bei einer Auslastung der Bettenkapazitäten von 79,70% (entsprechend des Jahres 2009) erzielt das UPF ein positives Betriebsergebnis von 145 787,38 €. Hierbei wurden jedoch gewisse Kosten nicht berücksichtigt, z.B. Bereitstellung von 2 Schwerpunkthinhabern zur Sicherstellung einer 24-h-Bereitschaft mit entsprechenden Urlaubs- und Vertretungsregelungen, interdisziplinäre Fallkonferenzen, Synergien durch gemeinsame Dienste der OP-Pflege und der Ärztinnen und Ärzte für Gynäkologie und Geburtshilfe, etc. [12]. Generell führt jede Abweichung der Bettenauslastung um einen Prozentpunkt zu einer Änderung des Betriebsergebnisses von etwa 48 000 €. Dieses führt dazu, dass das UPF bei Vollausslastung der zur Verfügung stehenden Betten ein positives Betriebsergebnis von 1 124 999,15 € erzielen könnte. Hätte das UPF die Möglichkeit, gewisse Bettenkapazitäten anderer Stationen der Frauenklinik des Universitätsklinikums Erlangen teilweise zu belegen und damit eine Auslastung der eigentlichen Bettenkapazitäten von 120% zu realisieren, ohne dabei höhere Fixkosten bewältigen zu müssen, wäre ein Gewinn von 2 088 844,95 € bei gleich bleibendem Leistungsangebot und Fallmix möglich. Diese Überlastung der Bettenkapazitäten kann auch dadurch ermöglicht werden, dass eine Patientin an einem Tag entlassen wird und am selben Tag eine andere Patientin in das freigewordene Bett aufgenommen wird. Der direkte Zusammenhang zwischen Betriebsergebnis auf Basis des Realmodells und der Auslastung der Bettenkapazität wird in Abb. 1 grafisch präsentiert.

## Diskussion

Vor dem Hintergrund der Finanzierungsprobleme und dem ständig steigenden Anpassungsdruck im deutschen Gesundheitssystem, u.a. auch durch Mindestmengenvereinbarungen und Vereinbarungen bezüglich der Struktur-, Prozess- und Ergebnisqualität, wird die Frage nach der Finanzierbarkeit der angebotenen Leistungen immer wichtiger. Die Perinatalzentren unterliegen den Kriterien des Gemeinsamen Bundesausschusses, der die Zentren in 4 verschiedene Level (Level I–IV) einteilt. Aufgrund der hohen Anforderungen und den damit verbundenen personellen und monetären Ressourcen stehen gerade die Perinatalzentren des Level I unter einem besonderen finanziellen Druck. Somit ist es hier für das Management relevant, Leistungen nach profitablen und defizitären DRGs differenzieren zu können und ggf. Maßnahmen je nach Möglichkeit einzuleiten [13].

Zwar scheint die Tatsache, dass auch geburtshilfliche Abteilungen mit mangelnder Infrastruktur und gleichbleibend niedrigen Geburtenzahlen weiter betrieben werden, dafür zu sprechen, dass geburtshilfliche Leistungen grundsätzlich gewinnbringend sind. Bei der genaueren Analyse fällt jedoch auf, dass die Finanzierbarkeit in der Geburtshilfe nur für gewisse Leistungen gegeben ist und z.B. die generelle Refinanzierung von invasiven geburtshilflichen Eingriffen im DRG-System fraglich ist [14]. Auch sind lokalpolitische Beweggründe zu nennen, die durch kommunale Subventionierung defizitärer geburtshilflicher Einrichtungen deren Fortbestehen sicherstellen, um z.B. weiterhin Geburten in gewissen Landkreisen zu ermöglichen.

Durch die vorliegenden theoretischen Modelle auf einer realen Kalkulationsgrundlage wird verdeutlicht, dass ein zuvor profi-

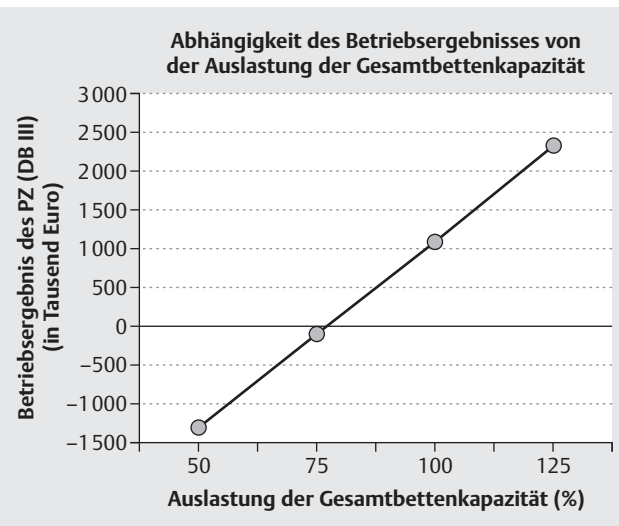

Abb. 1 Abhängigkeit des Betriebsergebnisses von der Auslastung der Gesamtbettenkapazität (PZ = Perinatalzentrum; DB = Deckungsbeitrag).

tables Perinatalzentrum Level I durch geringe Änderungen bei der Auslastung der Bettenkapazitäten und durch eine Änderungen des Leistungsangebots sehr schnell mit erheblichen Verlusten rechnen muss. In diesem Zusammenhang muss auch auf Faktoren hingewiesen werden, welche nicht von den Krankenhäusern bis in das letzte Detail gesteuert werden können, wie z.B. der Wille der Patientinnen, in welcher Klinik sie behandelt werden möchten. Gerade in der Geburtshilfe hat die Empfehlung der niedergelassenen Ärztinnen und Ärzte eine untergeordnete Bedeutung. Mundpropaganda und Empfehlungen von Freunden und Bekannten sind unter dem Stichwort „Kreißsaaltourismus“ besonders relevant [15, 16].

Im Rahmen der theoretischen Modelle wurden mehrere Fragestellungen bearbeitet. Zunächst wurde gezeigt, dass die Fallzahl bzw. Bettenauslastung einen enormen Einfluss haben kann. Das UPF liegt im Realmodell mit einer Bettenauslastung von 79,70% sehr nahe an der Schwelle von knapp 77%, an der das positive Betriebsergebnis in ein negatives übergeht. Für die Praxis heißt dies, dass hohe Fallzahlen für Perinatalzentren als besonders entscheidend einzustufen sind. Aber auch das Leistungsspektrum hat einen enormen Einfluss. In den kalkulierten Modellen reichen die Schwankungen des Betriebsergebnisses bei jeweils Vollausslastung der Bettenkapazitäten von einem Verlust von – 1 739 546,56 € bis zu einem Gewinn von 5 108 788,48 €. Somit wird deutlich, wie groß der Einfluss des Leistungsspektrums unter Berücksichtigung der Kosten und Erlöse ist. Die in der vorliegenden Arbeit dargestellte Tatsache, dass Perinatalzentren Level I im gültigen DRG-System nur unter gewissen Bedingungen finanzierbar sind, wurde bereits von Seelbach-Göbel [13] in einer Analyse dargestellt, in der ausschließlich DRGs berücksichtigt wurden, die mit einer Geburt abgeschlossen haben. Das untersuchte Perinatalzentrum Level I konnte nur ein positives Betriebsergebnis erwirtschaften, weil 46,95% der Geburten der DRG O60D, 16,37% der DRG O60C und 4,89% der DRG O60B entsprachen. Hierbei handelt es sich nicht um Kaiserschnitte, sondern um komplikationslose vaginale Entbindungen. Diese waren die einzigen, bei denen die InEK-Kalkulation (Institut für das Entgeltsystem im Krankenhaus) die tatsächlichen Kosten des Perinatalzentrums übertraf. Die mit sehr großem Abstand defizitärste

DRG 001A fiel dagegen mit einem Anteil an der Gesamtgeburtenzahl des Perinatalzentrums von 0,30% nur marginal ins Gewicht. Es wurden in der vorliegenden Arbeit auch Leistungsangebote erstellt, mit denen möglichst positive Betriebsergebnisse zu erzielen sind. Es mussten teilweise Leistungen aus dem Leistungsangebot gestrichen werden, teilweise die Anteile an der Auslastung der Engpasskapazitäten nur möglichst gewinnbringend umverteilt werden. Durch Modell „P“ konnte das Betriebsergebnis bspw. bei jeweils Vollausslastung der Bettenkapazitäten von 1 124 999,15 € auf 5 108 788,48 € verbessert werden.

In Modell „A“ wurde aufgezeigt, dass ein positives Betriebsergebnis eines Perinatalzentrums insbesondere von der Anzahl der Geburten abhängig ist. Im Vergleich zu dem Fallmix des UPF aus dem Jahr 2009 und einer Auslastung der Bettenkapazität von 100% bei einem Betriebsergebnis von 1 124 999,15 € ergibt sich bei einem ansonsten unveränderten Fallmix, allerdings ohne Geburten und ohne P-DRGs, bei einer Vollausslastung der Bettenkapazitäten ein Verlust von – 1 739 546,56 €. Dieses Modell beachtet nicht, dass in jedem Perinatalzentrum Kinder zur Welt kommen und insbesondere auch bei Perinatalzentren Level I bestimmte Mindestmengen vorausgesetzt werden. Es ist allerdings aus dieser Simulation ersichtlich, dass die DRGs, welche nicht unmittelbar mit einer Geburt enden, für ein Perinatalzentrum Level I die durchschnittlich anfallenden Kosten nicht adäquat decken können. Die in Modell „A“ dargestellte Unterfinanzierung von Perinatalzentren bei zu geringen Geburtenzahlen könnte für deutsche Geburtskliniken zu einer ernsthaften finanziellen Bedrohung werden, wenn sich in Deutschland die Geburtshilfe an den Niederlanden orientiert: im Jahr 2004 erfolgten hier 30% der Geburten als Hausgeburten [17].

Aufgrund der höheren Relativgewichte und den daraus resultierenden höheren Erlösen für Kaiserschnitte wird gelegentlich suggeriert, dass Perinatalzentren nur durch das Anheben der Sectio-Rate kostendeckend arbeiten können [18–20]. Heer et al. geben stattdessen zu bedenken, ob neben den vaginalen Geburten die elektiven Sectiones überhaupt kostendeckend durchgeführt werden können [21]. Die Vermutung von Hornemann und Kollegen [18], dass vaginale Geburten durch primäre Sectiones subventioniert werden könnten, beruht auf der Tatsache, dass in dieser Arbeit die hohen Vorhaltekosten der Geburtshilfe nicht beachtet wurden. Es wurden ausschließlich die Personalkosten berücksichtigt, die dem jeweiligen Geburtsmodus direkt und unmittelbar zuordenbar waren. Wie u. a. Schwenzer und Kollegen [22] bereits kritisierten, müssen allerdings auch diejenigen Personalkosten auf die Geburten umgelegt werden, die auch ohne ein aktuelles Geburtsgeschehen anfallen. Auch Seelbach-Göbel [13] merkt an, dass durch die Ausblendung der Kosten der nicht medizinischen Infrastruktur ein verzerrtes Bild entsteht. Diese Kosten haben üblicherweise einen Anteil von 25–30% der Gesamtkosten eines Perinatalzentrums.

Weltweit wird seit Jahren eine steigende Kaiserschnitttrate verzeichnet. Deutschland liegt mit 28,5% im oberen Mittelfeld [23, 24]. Als ein Grund für die ansteigenden Kaiserschnitttraten wird die bessere Steuerbarkeit für die Patientinnen und auch für die Ärztinnen und Ärzte genannt. Daneben wird insbesondere der fragliche ökonomische Vorteil im Vergleich zur Spontangeburt diskutiert. Eine Analyse des französischen Krankenhausverbands aus dem Jahr 2008 zeigte, dass die Kaiserschnitttrate in Krankenhäusern mit privater Trägerschaft höher liegt als in öffentlichen Einrichtungen, wie bspw. Universitätskliniken, obwohl letztere eigentlich für Risikoschwangerschaften, bei denen mehr Kaiserschnitte indiziert sein sollten, verantwortlich sind [25]. Nach Fei-

ge [20] handelt es sich nur bei 2–3% der Kaiserschnitte um sog. „Wunsch-Sectiones“ der Patientinnen. Hieraus und aus den oben genannten medizinisch indizierten 15–20% der Kaiserschnitte leitet er ab, dass etwa 10–15% der Kaiserschnitte auf Wunsch der Ärztinnen und Ärzte erfolgen.

Basierend auf den Ergebnissen der eigenen Kalkulationen kann zusammenfassend ein Anheben der Sectio-Rate beim direkten Vergleich aller relevanten DRGs aus wirtschaftlicher Sicht nicht empfohlen werden. Zu dieser Einschätzung dient der durchschnittliche Deckungsbeitrag I je DRG-Fall pro Pflage-tag, also der Betrag, der nach Abzug der einer DRG zurechenbaren variablen Kosten von deren Erlös pro Pflage-tag übrig bleibt, um die Fixkosten zu decken. Dieser belief sich bei allen Kaiserschnitten (DRGs 001A–F), ohne Berücksichtigung der jeweiligen Fallzahlen, durchschnittlich auf 332,13 € und bei allen vaginalen Geburten (DRGs 002A/B, 060A–D) durchschnittlich auf 426,56 €. Nach detaillierter Analyse muss allerdings bemerkt werden, dass bei einer direkten Gegenüberstellung der relevanten DRGs dennoch Unterschiede existieren: mit einem durchschnittlichen Deckungsbeitrag I je DRG-Fall pro Pflage-tag von 448,28 € sind Kaiserschnitte bei Neugeborenen über 33 Schwangerschaftswochen ohne komplizierende Diagnose (DRG 001F) bei einer begrenzenden Engpasskapazität „Pflage-tag“ als gewinnbringender zu bezeichnen als vaginale Entbindungen ohne komplizierende Diagnose (DRG 060D) mit einem Wert von 416,56 €. Im Gegensatz dazu scheinen Kaiserschnitte bei Frühgeborenen bis 25 vollendete Schwangerschaftswochen (DRG 001A: 193 €) ökonomisch weniger lohnenswert zu sein als vaginale Entbindungen mit komplizierender OR-Prozedur bis 33 vollendete Schwangerschaftswochen (DRG 002A: 535,39 €) oder vaginale Entbindungen mit mindestens einer schweren komplizierenden Diagnose bis 33 vollendete Schwangerschaftswochen (DRG 060A: 454,18 €). Mit einem durchschnittlichen Deckungsbeitrag I je DRG-Fall pro Pflage-tag von 448,28 € ist die DRG 001F (Sectio ohne komplizierende Diagnose > 33 Schwangerschaftswochen) aus geburtshilflicher Sicht die einzige Kaiserschnitt-DRG, die als gewinnbringender als einzelne DRGs vaginaler Entbindungen zu bezeichnen ist.

Die ökonomischen Nachteile der Sectio-DRGs gegenüber den vaginalen Geburten werden durch Modell „E“ verdeutlicht. In dem Modell werden alle Bettenkapazitäten, die im realen Modell für Geburts-DRGs verwendet wurden (83,76%), zu gleichen Anteilen (13,96%) auf die 6 verschiedenen Sectio-DRGs verteilt und alle anderen Anteile der übrigen Nicht-Geburts-DRGs an den Gesamtpflage-tag, im Vergleich zur Kalkulation des Jahres 2009, gleich belassen. Insgesamt resultiert bei einer Vollausslastung der Bettenkapazitäten in Modell „E“ ein negatives Betriebsergebnis von – 75 948,71 €, welches damit um 1 280 935,53 € unter dem Betriebsergebnis von Modell „J“ liegt, in dem alle Bettenkapazitäten der Geburts-DRGs zu je 20,94% auf die vaginalen Entbindungen (DRGs 060A–D) umverteilt werden. Werden dagegen ausschließlich vaginale Entbindungen mit komplizierender OR-Prozedur zu je 41,88% Anteilen an der Ausschöpfung der Engpasskapazität „Pflage-tag“ zur Entbindung angeboten (DRG 002A/B), so könnte das Betriebsergebnis sogar, gemäß Modell „N“, auf 3 133 122,76 € verbessert werden.

Auch Schwenzer und Kollegen [22] kamen zu der Schlussfolgerung, dass Kaiserschnitte in Deutschland im Vergleich zu vaginalen Entbindungen keinen ökonomischen Vorteil bringen. Ökonomisch lohnenswert wird die Konzentration auf elektive Sectiones erst dann, wenn eine Geburtsklinik bzw. ein Perinatalzentrum nur zu bestimmten Zeiten Sectiones durchführt, damit die Vorhaltekosten reduziert bzw. vernachlässigt werden können [22].

Bei allen Anreizen der Mehrerlöse von Kaiserschnitten müssen auch die höheren Kosten beachtet werden. Außerdem muss insbesondere bei einem Anheben der Sectio-Rate beachtet werden, dass die Kosten für die übrigen vaginalen Geburten ansteigen, da die Vorhaltekosten auf weniger vaginale Geburten verteilt werden müssen.

Seelbach-Göbel [13] zeigte auf, dass ein Perinatalzentrum Level I seine Ist-Kosten vorwiegend durch Spontangeburt (DRG O60D) deckt und ohne diese ein negatives Betriebsergebnis erwirtschaften würde. Die Ist-Kosten von vaginalen Geburten der DRGs O60B (123 €), O60C (194 €) und O60D (246 €) unterschritten die Soll-Kosten der InEK-Kalkulation. Teilweise bei Weitem nicht gedeckt durch die InEK-Kalkulation waren stattdessen die Ist-Kosten für Kaiserschnitte. Kostenunterdeckungen sind im Folgenden am negativen Vorzeichen zu erkennen. Insbesondere Frühgeburten (O01A: -2992 €, O01B: -626 €), sowie Geburten mit mehreren komplizierenden Diagnosen (O01C: -846 €, O01D: -343 €), aber auch Kaiserschnitte nach der 33. vollendeten SSW (O01E: -332 €, O01F: -233 €) konnten nicht kostendeckend geleistet werden. Somit können die Kosten für komplizierte vaginale Geburten vor der 33. SSW (O02A: -398 €, O60A: -1059 €), sowie die Kosten einer vaginalen Entbindung mit komplizierender OR-Prozedur über der 33. SSW (O02B: -96 €) in einem Perinatalzentrum Level I in Bezug auf die kalkulierten Kosten des InEK nicht gedeckt werden [13]. Im Gegensatz zur vorliegenden Arbeit wurden von Seelbach-Göbel allerdings nur DRGs berücksichtigt, die mit einer Geburt beendet wurden. Unberücksichtigt blieben folglich die restlichen stationären Aufenthalte während der Schwangerschaft. Bei der Gegenüberstellung der Ist-Kosten von Universitätskliniken und der InEK-Kalkulation ergab sich auch lediglich für die DRG O60D eine Kostendeckung. Für alle anderen Geburts-DRGs der Unikliniken ergaben sich ansonsten teilweise erhebliche Verluste [13].

Publikationen aus anderen Ländern sind zum Kostenvergleich der verschiedenen Geburtsmodi von bedeutsamer Aussagekraft [22]. Henderson und Kollegen [26] veröffentlichten eine Übersichtsarbeit, in der sie 49 internationale Publikationen hinsichtlich der Kosten von komplikationslosen vaginalen Entbindungen und Kaiserschnitten auswerteten. Die Studien mit hoher Aussagekraft zeigten, dass Kaiserschnitte im Durchschnitt teurer sind als vaginale Geburten. Die Kosten beliefen sich für komplikationslose Spontangeburt zwischen 629 £ und 1298 £, für Kaiserschnitte lagen sie dagegen mit 1238 £ bis 3551 £ deutlich darüber.

Kazandjian und Kollegen [27] kamen durch ihre Analysen zu dem Schluss, dass Kaiserschnitte nicht immer kostspieliger sind als vaginale Entbindungen. Sie berücksichtigten neben den Kosten des Geburtsmodus auch die Kosten für die Behandlung der Neugeborenen, sie betrachteten also ein Perinatalzentrum als zusammengehörende ökonomische Einheit. Hierbei resultierten für die Versorgung von Mutter und Kind, inklusive Neugeborenen-Intensivstation, nach einer vaginalen Entbindung durchschnittlich Kosten in Höhe von 17624,38 \$ und nach einem Kaiserschnitt dagegen nur in Höhe von 13805,47 \$. Lässt man die Kosten der Neugeborenen-Intensivstation außer Acht, ergaben sich Kosten von 7529 \$ für Kaiserschnitte und 5012,80 \$ für vaginale Entbindungen.

Seelbach-Göbel [13] zeigte auf, dass insbesondere die komplizierten Fälle im aktuellen DRG-System nicht hinreichend vergütet werden. Durch die Ergebnisse der theoretischen Modelle „B“ und „L“ wurde diese für Perinatalzentren Level I existentielle Frage analysiert. Hierdurch konnte gezeigt werden, dass es unter

rein ökonomischen Gesichtspunkten empfehlenswert ist, möglichst wenige Risikoschwangerschaften zu betreuen und stattdessen mehr Schwangerschaften ohne Pathologien im Leistungsangebot zu haben.

Aufgrund der aktuellen Mindestmengendiskussion für Perinatalzentren bei der Versorgung von Früh- und Neugeborenen mit sehr niedrigem Geburtsgewicht muss darauf hingewiesen werden, dass manche theoretische Modelle nicht oder nur schwer mit der Erhaltung des Status „Perinatalzentrum Level I“ vereinbar wären. Insbesondere gilt dies für die Modelle „A“ und „L“, in denen entweder gar keine Geburten möglich sein sollen, oder alle pathologischen Schwangerschaften vermieden werden. Fraglich ist die Aufrechterhaltung des momentanen Levels des UPF bei den theoretischen Modellen „C“, „D“, „F“ und „H“, in denen zwar teilweise genügend sehr untergewichtige Neugeborene zur Welt kommen könnten, diese dann allerdings nicht behandelt werden, sondern in andere Kliniken verlegt werden müssen. Durch den in den Modellen „I“ und „K“ vorgestellten Fallmix ist dagegen sicherlich damit zu rechnen, dass die notwendigen Fallzahlen sehr untergewichtiger Neugeborener nicht erreicht werden können. Folgernd aus den vorliegenden Ergebnissen könnte es für manche Krankenhäuser sinnvoller sein, den Status eines Perinatalzentrums Level III oder IV anzustreben als ein Level I oder II. Hier muss jedoch betont werden, dass derartige Überlegungen die flächendeckende Versorgung mit Perinatalzentren der höchsten Stufe gefährden. Anreize durch Zuschläge oder ähnliche Unterstützungen erscheinen in diesem Licht aus gesundheitsökonomischer Sicht sinnvoll.

Aus betriebswirtschaftlicher Sicht könnte dennoch die Herunterstufung eines Perinatalzentrums sinnvoll sein, da hierdurch insbesondere hohe Personalkosten eingespart werden könnten. In den beschriebenen theoretischen Modellen wurde dieser Aspekt nicht berücksichtigt. Auch die Tatsache, dass bei einer Änderung des Leistungsprogramms einzelne Kostenstellen komplett oder teilweise geschlossen werden könnten, wurde bei den vorliegenden Kalkulationen nicht integriert. Vereinfachend wurde von einer exakten Umverteilung der Kosten auf die anderen Kostenstellen ausgegangen. Bei den theoretischen Modellen handelt es sich somit keinesfalls um reale Szenarios, sondern um theoretische Grenzmodelle mit dem Ziel, betriebswirtschaftliches Denken und Handeln zu erleichtern. Zur Realisierung von möglichen Leistungsprogrammänderungen sind Marketingkenntnisse und -maßnahmen unabdingbar. Lux und Kollegen [16] zeigten, welche vielschichtigen Faktoren für Patientinnen bei der Klinikwahl bedeutsam sind. Würde das Krankenhausmanagement seine Strategien und Planungen nicht langfristig auf die Wünsche der Patientinnen ausrichten, wäre sehr leicht auch ein Kippen eines positiven Betriebsergebnisses möglich.

Sicherlich rufen die vorgestellten theoretischen Modelle teilweise erheblichen Diskussionsbedarf hervor und haben einige weitere Limitationen. Aufgrund der Tatsache, dass die theoretischen Modelle auf den Ergebnissen der Berechnung des tatsächlichen Betriebsergebnisses des UPF aus dem Jahr 2009 aufbauen, gelten alle dort genannten Einschränkungen, Grenzen und Besonderheiten auch für die theoretischen Modelle. Ferner muss festgestellt werden, dass die herangezogenen Deckungsbeiträge I teilweise aufgrund geringer Fallzahlen in ihrer Aussagekraft eingeschränkt sind. Durch derartige Variationen können die theoretischen Modelle keinen Anspruch auf eine vollkommene Darstellung der finanziellen Zusammenhänge erheben. Dieses ist allerdings auch nicht das Ziel der theoretischen Modelle – durch

Darstellung von Grenzfällen soll ein betriebswirtschaftliches Denken und Entscheiden unterstützt werden.

Aufgrund der Ausgliederung der Kinderklinik aus den Kalkulationen und der speziell geburtshilflichen Betrachtung sind insgesamt auch nur eingeschränkte Aussagen über ökonomische Aspekte der Mindestmengendiskussion möglich. Grundsätzlich muss hinterfragt werden, ob es überhaupt ethisch vertretbar ist, wirtschaftliche Interessen bei der Versorgung von Früh- und Neugeborener Kinder und ihrer Mütter zu untersuchen und aus den Ergebnissen die entsprechenden Konsequenzen zu ziehen. Hierbei ist die Unterscheidung nach „gewinnbringenden“ und „wenig lohnenswerten“ DRGs sicherlich weder aus medizinischer noch aus ethischer Sicht erstrebenswert, sondern rein auf betriebswirtschaftliche Ziele ausgerichtet. Allen ethischen, medizinischen und strukturellen Aspekten und Vorgaben wurden in den theoretischen Modellen eine den ökonomischen Fragestellungen untergeordnete Bedeutung beigemessen. Perinatalzentren Level I dürfen als Maximalversorger keine Fälle ablehnen. Es muss jedoch ohnehin, insbesondere bei teilweise reduziert planbaren geburtshilflichen Leistungen, bei Überlegungen hinsichtlich des Leistungsprogramms berücksichtigt werden, dass bei Aufnahme einer Patientin nicht direkt ersichtlich ist, welche DRG für diese Patientin und ihr Neugeborenes bei Entlassung kodiert werden kann.

Ferner ist zu prüfen, ob bei einer Auslastung der zur Verfügung stehenden Bettenkapazitäten von 100% mit höheren Fixkosten als in der Kalkulation des Betriebsergebnisses des UPF im Jahr 2009 zu rechnen ist. Prinzipiell würden sich die Fixkosten (wie z.B. Personalkosten) nur bei einer Kapazitätserweiterung erhöhen. Angesichts der ohnehin schon knappen Personalstruktur kann allerdings angezweifelt werden, ob die Versorgung der Patientinnen und deren Neugeborenen bei Vollaustattung der Bettenkapazitäten noch adäquat gewährleistet werden könnte. In den vorliegenden Berechnungen ging man deshalb von einer Veränderung der Fixkosten bei einer höheren oder niedrigeren Bettenauslastung aus. Vereinfachend wurde den Fixkosten kein sprungfixer, sondern ein proportionaler Verlauf unterstellt. Die Validität der durchgeführten theoretischen Modelle kann aktuell nicht anhand anderer vergleichbarer Modelle für deutsche Perinatalzentren überprüft werden. Weitere Analysen hierzu, insbesondere auch für Perinatalzentren anderer Versorgungsstufen (Level II, III und IV), wären wünschenswert.

### Fazit für die Praxis

Durch die entworfenen theoretischen Modelle werden mögliche Konsequenzen hinsichtlich der Planung und Steuerung der Fallzahlen und des Leistungsprogramms von Perinatalzentren aufgezeigt.

Die Frage nach der Finanzierbarkeit von Perinatalzentren kann nicht mit letzter Gewissheit beantwortet werden. Zwar deuten die Ergebnisse der Kalkulation des Betriebsergebnisses des UPF aus dem Jahr 2009 darauf hin, dass Perinatalzentren Level I aktuell mit einer hohen Auslastung der Bettenkapazitäten und einem gewinnbringenden Fallmix ein positives Betriebsergebnis erzielen können, aber durch die theoretischen Modelle werden allerdings auch vielschichtige defizitäre Einflüsse aufgezeigt, welche sehr schnell die Existenz eines Perinatalzentrums Level I gefährden können. Dieses unterstreicht die Notwendigkeit eines effizienten Managements.

### Interessenkonflikt

▼  
Nein.

### Literatur

- 1 Lohmann H. Erfolgsfaktor Medizin: Anforderungen an ein modernes Krankenhausmanagement. Berlin, Heidelberg: Springer-Verlag; 2009: 3–14
- 2 Beckmann MW, Bader W, Bechtold I et al. Finanzierung und finanzielle Probleme von Leistungen und Strukturen im Fachgebiet Gynäkologie und Geburtshilfe im Jahr 2011 – allgemeine Aspekte und geburtshilfliche Versorgung. Geburtsh Frauenheilk 2011; 71: 367–380
- 3 Lux MP, Fasching PA, Loehberg CR et al. Health services research and health economy – quality care training in gynaecology, with focus on gynaecological oncology. Geburtsh Frauenheilk 2011; 71: 1046–1055
- 4 Gemeinsamer Bundesausschuss. Vereinbarung des Gemeinsamen Bundesausschusses über Maßnahmen zur Qualitätssicherung der Versorgung von Früh- und Neugeborenen vom 20. September 2005, zuletzt geändert am 20.08.2009. Bundesanzeiger; 2009: 4450
- 5 Zapp W, Oswald J. Controlling-Instrumente für Krankenhäuser. Stuttgart: W. Kohlhammer GmbH; 2009: 17–288
- 6 Krämer N. Strategisches Kostenmanagement im Krankenhaus, Anwendung unter besonderer Berücksichtigung von DRG-Fallpauschalen. In: Schriftenreihe Gesundheitsmanagement und Medizinökonomie. Hamburg: Verlag Dr. Kovac; 2009: 1–172
- 7 Leititis JU. Rationalisierungsinstrument mit Nebenwirkungen, Ökonomische und medizinische Spannungsfelder beim Einsatz vollpauschalierter Vergütungen. Forum für Gesellschaftspolitik; 2000: 194–197
- 8 Goedereis K. Einfluss auf die Versorgungslandschaft. In: Rau F, Roeder N, Hensen P, Hrsg. Auswirkungen der DRG-Einführung in Deutschland, Standortbestimmung und Perspektiven. Stuttgart: W. Kohlhammer GmbH; 2009: 239–253
- 9 Foit K, Vera A. Anreizorientierte Krankenhausvergütung mit Fallpauschalen. Gesundheitsökonomie und Qualitätsmanagement 2006; 11: 245–251
- 10 Lehnen H, Mosblech N, Reineke T et al. Prenatal clinical assessment of sFlt-1 (soluble fms-like tyrosine kinase-1)/PlGF (placental growth factor) ratio as a diagnostic tool for preeclampsia, pregnancy-induced hypertension, and proteinuria. Geburtsh Frauenheilk 2013; 73: 440–445
- 11 Reinhard J, Hanker L, Sanger N et al. Neonatal transfer rate and mode of delivery from 37th week of gestation in a German perinatal center level I. Geburtsh Frauenheilk 2013; 73: 324–329
- 12 Lux MP, Kraml F, Wagner S et al. Financial viability of perinatal centers in the longer term, taking legislative requirements into account? An examination of the cost-revenue structure of a level I perinatal center. In vivo 2013; in press
- 13 Seelbach-Göbel B. Struktur und Refinanzierung in der Geburtshilfe – Trägt sich die Geburt im Perinatalzentrum Level I? Z Geburtsh Neonatol 2010; 214: 198–204
- 14 Schmidt S. Refinanzierung der Geburtshilfe. Z Geburtshilfe Neonatol 2010; 214: 175–176
- 15 Lux MP, Fasching PA, Bani M et al. Marketing von Brust- und Perinatalzentren – Sind Patientinnen mit dem Produkt „zertifiziertes Zentrum“ vertraut? Geburtsh Frauenheilk 2009; 69: 321–327
- 16 Lux MP, Fasching PA, Schrauder M et al. The era of centers: the influence of establishing specialized centers on patients' choice of hospital. Arch Gynecol Obstet 2011; 283: 559–568
- 17 Euro-Peristat. European perinatal health report. Luxemburg, 2008. www.europeristat.com; Stand: 15.06.2011
- 18 Hornemann A, Bohlmann MK, Altgassen C et al. Primäre Sectiones subventionieren Spontangeburt, Spielen finanzielle Interessen bei der steigenden Sectiorate eine Rolle? Geburtsh Frauenheilk 2008; 68: 1082–1088
- 19 Hornemann A, Bohlmann MK, Thill M et al. Ökonomie der Geburtshilfe – Primäre Sektio versus Spontanpartus – Bilanz der aktuellen Vergütung im G-DRG-System. Geburtsh Frauenheilk 2008; 68: 520
- 20 Feige A. „Heute sparen, morgen besser steuern“, Kritische Anmerkungen zu den Auswirkungen der Sparmaßnahmen auf pränatal-/geburtsmedizinische Leistungen. Z Geburtsh Neonatol 2010; 214: 177–179
- 21 Heer IM, Kahlert S, Rummel S et al. Hospital treatment, Is it affordable? A structured cost analysis of vaginal deliveries and planned caesarean sections. Eur J Med Res 2009; 14: 502–506

- 22 Schwenzer T, Schwenzer C. Kosten und Erlöse für eine Geburt in Deutschland, Eine Analyse auf der Basis der Daten des Instituts für das Entgeltsystem im Krankenhaus (InEK). *Z Geburtshilfe Neonatol* 2010; 214: 188–197
- 23 Ecker JL, Frigoletto jr. FD. Cesarean delivery and the risk-benefit calculus. *N Engl J Med* 2007; 356: 885–888
- 24 OECD. Gesundheit auf einen Blick 2009: OECD Indikatoren. OECD Publishing; 2010: 87–110
- 25 FHF – *Fédération hospitalière de France*. Étude sur les césariennes. Paris, 2008. [www.fhf.fr](http://www.fhf.fr); Stand: 03.03.2011
- 26 Henderson J, McCandlish R, Kumiega L et al. Systematic review of economic aspects of alternative modes of delivery. *BJOG* 2001; 108: 149–157
- 27 Kazandjian VA, Chaulk CP, Ogunbo S et al. Does a Cesarean section delivery always cost more than a vaginal delivery? *J Eval Clin Pract* 2007; 13: 16–20
